# Supplementary material
Source: PubMed Central journal article supplement (PMC8185602)
Supplement: NIHPP2021.01.27.21250604V3-supplement-1.pdf [file NIHPP2021.01.27.21250604V3-supplement-1.pdf]

## 5 Supplementary Figures

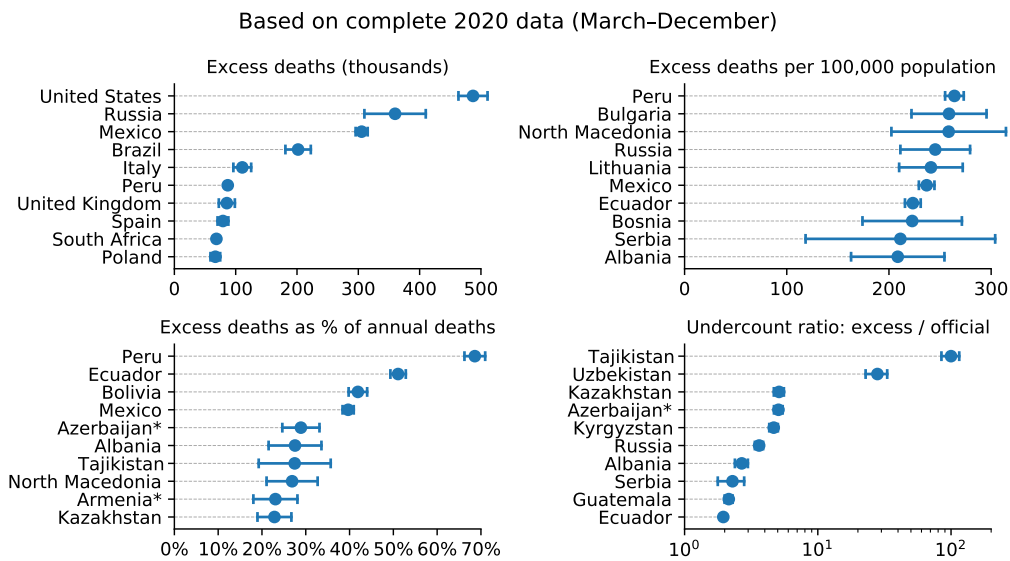

**Figure S1: Top 10 countries in the World Mortality Dataset by various excess mortality measures by the end of 2020.** Each subplot shows the top 10 countries for each of our four excess mortality measures: total number of excess deaths; excess deaths per 100,000 population; excess deaths as a percentage of baseline annual mortality; undercount ratio (ratio of excess deaths to reported COVID-19 deaths by the same date). Error bars denote 95% confidence intervals corresponding to the uncertainty of the excess deaths estimate. Countries with population below 100,000 are not shown. Excess mortality estimates in Armenia and Azerbaijan were downwards corrected by 4,000 to account for the war casualties (see Methods).
